# Supplementary material for: Clearance of Persistent SARS-CoV-2 RNA Detection in a NFκB-Deficient Patient in Association with the Ingestion of Human Breast Milk: A Case Report
Source: MDPI journal article supplement (doi:10.3390/v14051042), 2022-05-13
Supplement: s1 [file s1]

Supplementary Materials

# Clearance of Persistent SARS-CoV-2 RNA Detection in a NFκB-Deficient Patient in Association with the Ingestion of Human Breast Milk: A Case Report

Janine S. Sabino <sup>1,†</sup>, Mariene R. Amorim <sup>2,†</sup>, William M. de Souza <sup>3,†</sup>, Lia F. Marega <sup>1</sup>, Luciana S. Mofatto <sup>2</sup>, Daniel A. Toledo-Teixeira <sup>2</sup>, Julia Forato <sup>2</sup>, Rodrigo G. Stabeli <sup>4,5</sup>, Maria Laura Costa <sup>6</sup>, Fernando R. Spilki <sup>7</sup>, Ester C. Sabino <sup>8,9</sup>, Nuno R. Faria <sup>9,10,11</sup>, Bruno D. Benites <sup>12</sup>, Marcelo Addas-Carvalho <sup>12</sup>, Raquel S. B. Stucchi <sup>13</sup>, Dewton M. Vasconcelos <sup>14</sup>, Scott C. Weaver <sup>3,15</sup>, Fabiana Granja <sup>2,16,†</sup>, José Luiz Proenca-Modena <sup>2,17,18,\*,†</sup> and Maria Marluce dos S. Vilela <sup>1,\*,†</sup>

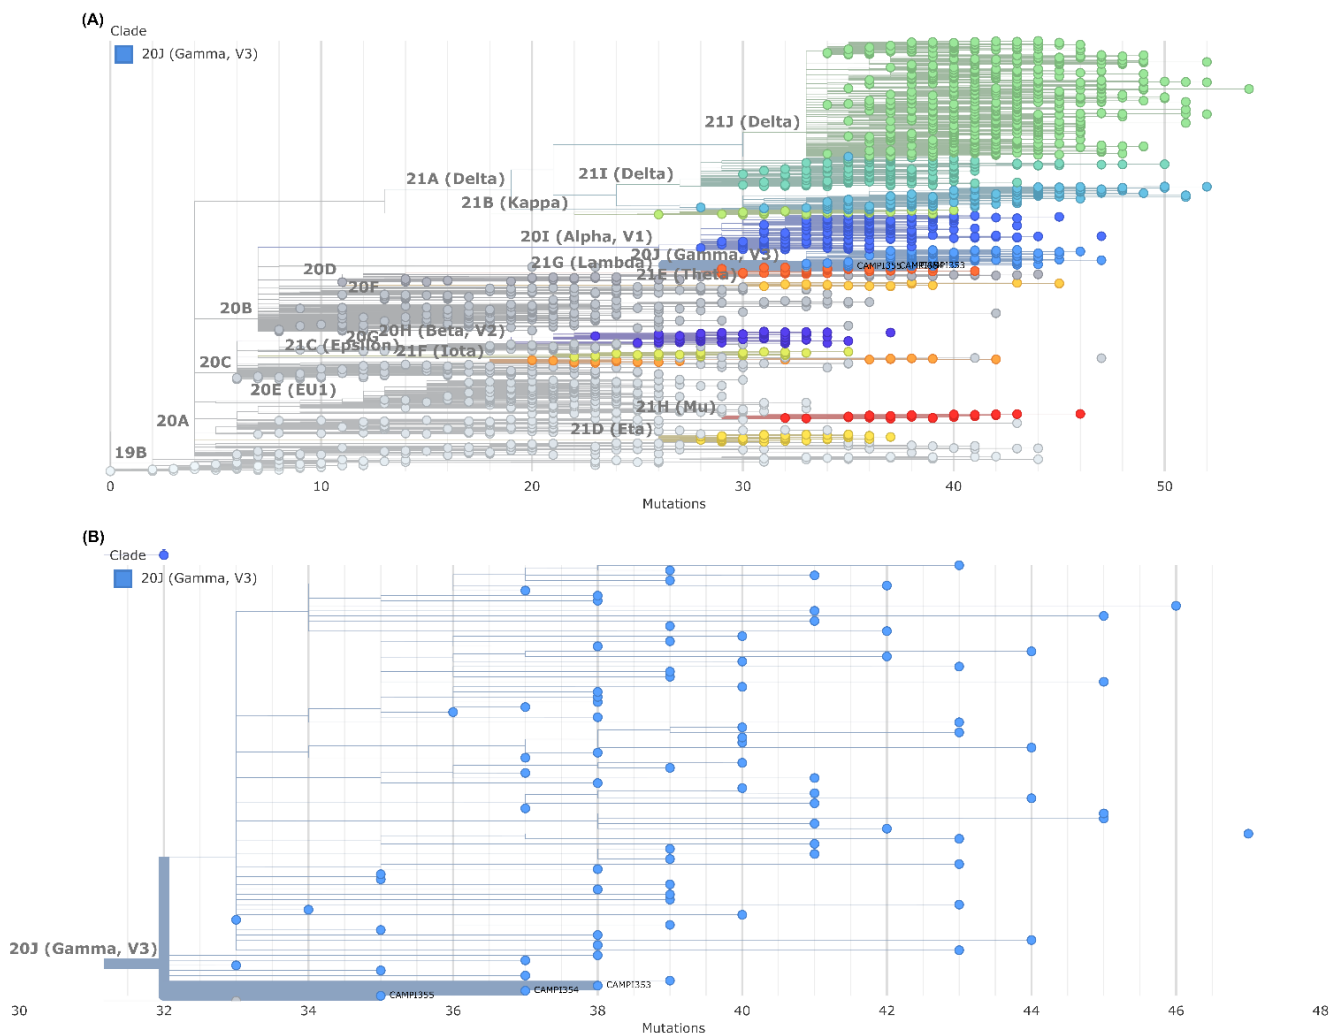

**Figure S1.** Maximum-likelihood phylogenetic analysis using NextStrain (Auspice tool(17). (A) Phylogenetic tree including clades related with 20J (Gamma V3). (B) The phylogenetic analysis shows the three SARS-CoV-2 genomes sequences from the proband (i.e., CAMPI353, CAMPI354 and CAMPI355) in the clade 20J (Gamma, V3).

**Table S1.** Mutation signatures of Gamma (PANGO P.1 lineage or NextStrain clade 20J) from genome sequencing of SARS-CoV-2.

| Amino Acid | Protein | Position     | CAMPI353 *   | CAMPI354 *   | CAMPI355 *   |
|------------|---------|--------------|--------------|--------------|--------------|
| aa         | ORF1A   | S1188L       | confirmed    | confirmed    | confirmed    |
| aa         | ORF1A   | K1795Q       | confirmed    | confirmed    | confirmed    |
| deletion   | ORF1A   | del3675/3677 | confirmed    | confirmed    | confirmed    |
| aa         | ORF1B   | P314L        | confirmed    | confirmed    | confirmed    |
| aa         | ORF1B   | E1264D       | confirmed    | confirmed    | confirmed    |
| aa         | S       | L18F         | confirmed    | confirmed    | confirmed    |
| aa         | S       | T20N         | confirmed    | confirmed    | confirmed    |
| aa         | S       | P26S         | confirmed    | confirmed    | confirmed    |
| aa         | S       | D138Y        | confirmed    | confirmed    | confirmed    |
| aa         | S       | R190S        | confirmed    | confirmed    | undetermined |
| aa         | S       | K417T        | confirmed    | confirmed    | confirmed    |
| aa         | S       | E484K        | undetermined | undetermined | undetermined |
| aa         | S       | N501Y        | undetermined | undetermined | undetermined |
| aa         | S       | D614G        | confirmed    | confirmed    | confirmed    |
| aa         | S       | H655Y        | confirmed    | confirmed    | confirmed    |
| aa         | S       | T1027I       | confirmed    | confirmed    | undetermined |
| aa         | S       | V1176F       | confirmed    | confirmed    | confirmed    |
| aa         | ORF3A   | G174C        | undetermined | undetermined | undetermined |
| aa         | ORF3A   | S253P        | undetermined | confirmed    | undetermined |
| aa         | ORF8    | S84L         | absence      | absence      | absence      |
| aa         | ORF8    | E92K         | confirmed    | confirmed    | confirmed    |
| aa         | N       | P80R         | confirmed    | confirmed    | confirmed    |
| aa         | N       | R203K        | confirmed    | confirmed    | confirmed    |
| aa         | N       | G204R        | confirmed    | confirmed    | confirmed    |
| aa         | NSP3    | S370L        | confirmed    | confirmed    | confirmed    |
| aa         | NSP3    | K977Q        | confirmed    | confirmed    | confirmed    |
| aa         | NSP3    | S1735F       | undetermined | undetermined | undetermined |
| aa         | NSP6    | L260F        | undetermined | undetermined | undetermined |
| deletion   | NSP6    | del106/108   | confirmed    | confirmed    | confirmed    |
| aa         | NSP12   | P323L        | confirmed    | confirmed    | confirmed    |
| aa         | NSP13   | E341D        | confirmed    | confirmed    | confirmed    |

\* sequences are available on GISAID (accession number: EPI\_ISL\_6513196, EPI\_ISL\_6513480, and EPI\_ISL\_6513725; <https://www.gisaid.org>). The coding regions are those annotated on Wuhan-Hu-1 (GenBank accession number: NC\_045512).

**Table S2.** Immunophenotyping of our patient.

| Cell Types                                                                             | 19 May 2021 | 12 July 2021 | Ref. Values  |
|----------------------------------------------------------------------------------------|-------------|--------------|--------------|
| CD3/mm <sup>3</sup> (%)                                                                | 849 (88.4)  | 2673 (91.55) | 849.1–1963.3 |
| CD4/mm <sup>3</sup> (%)                                                                | 234 (27.6)  | 612 (20.95)  | 477.5–1140.8 |
| CD8/mm <sup>3</sup> (%)                                                                | 466 (54.95) | 1909 (65.38) | 211.7–724.6  |
| CD4/CD8                                                                                | 0.50        | 0.32         | 1.2–4.5      |
| CD19/mm <sup>3</sup> (%)                                                               | 7 (0.7)     | 0.0          | 124.2–415.9  |
| CD16 <sup>+</sup> CD56/mm <sup>3</sup>                                                 | 107 (11.1)  | 158 (5.41)   | 137–567.8    |
| CD3/CD16 <sup>+</sup> CD56/mm <sup>3</sup>                                             | 65 (7.6)    | N/P          | 137–567.8    |
| TCRab <sup>+</sup> CD3 <sup>+</sup>                                                    | 760 (89.5)  | N/P          | -            |
| TCRab <sup>+</sup> CD3 <sup>+</sup> CD4 <sup>+</sup> CD8 <sup>-</sup> /mm <sup>3</sup> | 22 (2.9)    | N/P          | <1.5%        |
| CD4 <sup>+</sup> CD45RA <sup>+</sup>                                                   | N/P         | 112 (3.83)   | 137.8–574.5  |
| CD4 <sup>+</sup> CD45RO <sup>+</sup>                                                   | N/P         | 394 (13.50)  | -            |
| CD45 <sup>+</sup> RA <sup>+</sup>                                                      | N/P         | 1282 (43.90) | -            |
| CD45 <sup>+</sup> RO <sup>+</sup>                                                      | N/P         | 1413 (48.40) | -            |

Legend: N/P, not performed.

**Table S3.** C-reactive protein and ferritin values.

| Parameters                 | 19 May 2021 | 27 May 2021 | 7 June 2021 | 22 July 2021 | Ref. Values |
|----------------------------|-------------|-------------|-------------|--------------|-------------|
| C-reactive protein (mg/dL) | 41.2        | 1.7         | 2.0         | 2.0          | <0.5        |
| Ferritin (mg/L)            | 1464.0      | 918.7       | 728.4       |              | 30.0–400.0  |
